# Supplementary material for: Efficiency of the Cerebroplacental Ratio in Identifying High-Risk Late-Term Pregnancies
Source: MDPI journal article supplement (doi:10.3390/medicina59091670), 2023-09-15
Supplement: s1 [file s1]

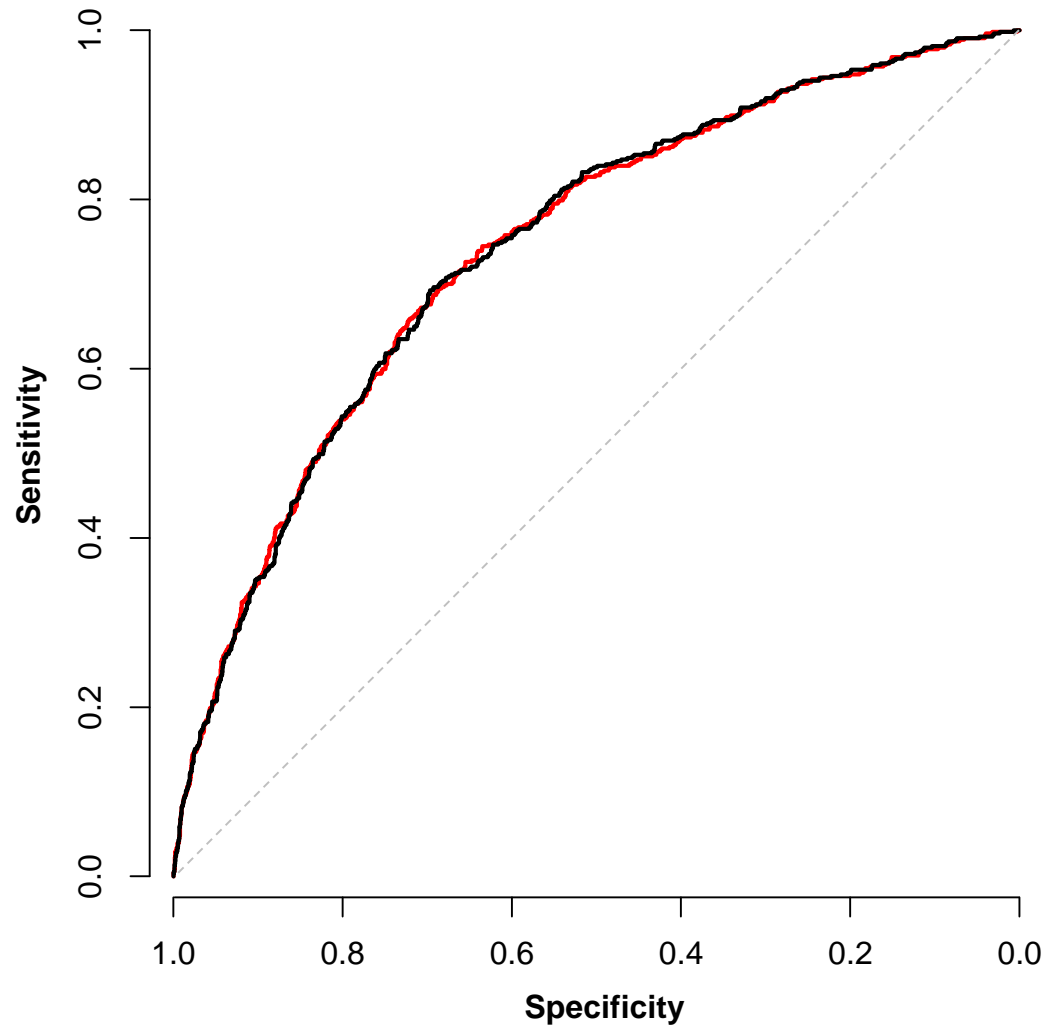

**Figure S1.** Receiver operating characteristics curves of the different models to predict adverse perinatal outcomes by maternal characteristics (red line) and maternal characteristics plus the cerebroplacental ratio (black line).
